# Supplementary material for: Synthesis of Enantiopure (S)-Atenolol by Utilization of Lipase-Catalyzed Kinetic Resolution of a Key Intermediate
Source: MDPI journal article supplement (doi:10.3390/ijms25063497), 2024-03-20
Supplement: s1 [file s1]

## Synthesis of Enantiopure (*S*)-Atenolol by Utilization of Lipase-Catalyzed Kinetic Resolution of a Key Intermediate

Mari Bergan Hansen,<sup>[1]</sup> Anna Liften Tennfjord,<sup>[1]</sup> Fredrik Heen Blindheim,<sup>[1]</sup> Lucas Hugo Yvan Bocquin<sup>[1]</sup> and Elisabeth Egholm Jacobsen<sup>[1]\*</sup>

<sup>1</sup> Department of Chemistry, Norwegian University of Science and Technology (NTNU), Høgskoleringen 5, N-7491 Trondheim, Norway.

### HPLC chromatograms

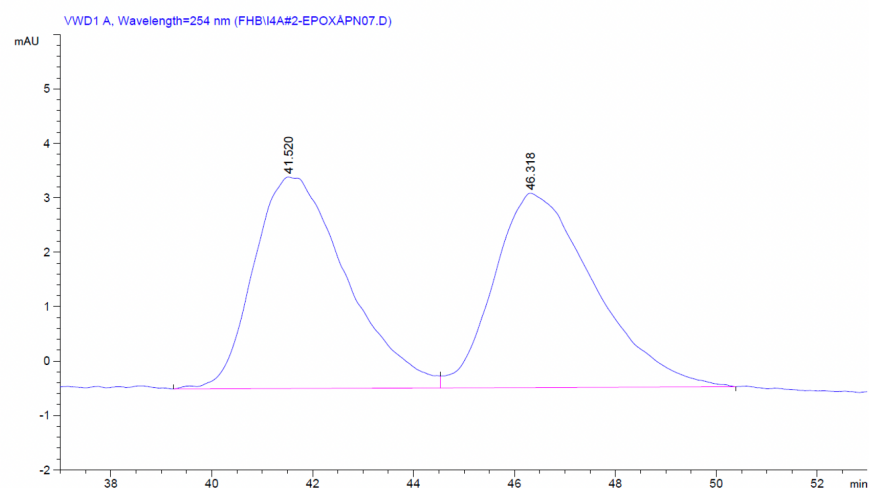

**Figure S1.** 2-(4-(3-Chloro-2-hydroxypropoxy)phenyl)acetamide (**2a**), resolved on a Chiralcel OD-H column (250 mm L x 4.6 mm ID, 5  $\mu$ m particle size), isocratic eluent *i*-PrOH: *n*-hexane, 17:83, 1.0 mL/min.  $t_R$  (*S*)-**2a** = 41.52 min,  $t_R$  (*R*)-**2a** = 46.31 min,  $R_S$  = 1.74.

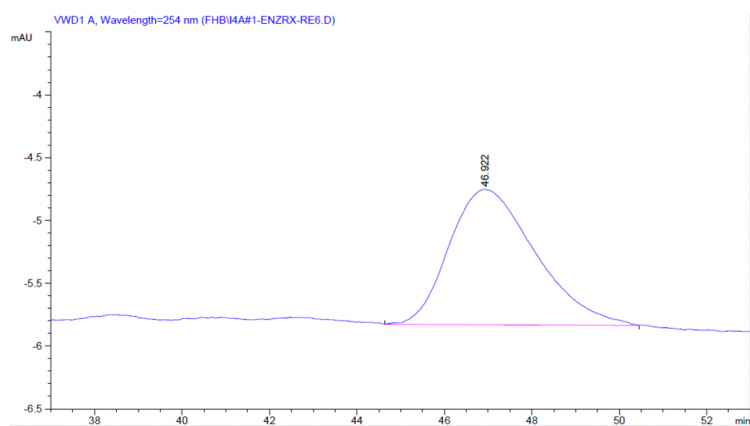

**Figure S2.** (*R*)-2-(4-(3-chloro-2-hydroxypropoxy)phenyl)acetamide ((*R*)-**2a**), analyzed on Chiralcel OD-H column (250 mm L x 4.6 mm ID, 5  $\mu$ m particle size), isocratic eluent *i*-PrOH: *n*-hexane, 17:83, 1.0 mL/min,  $t_R$  (*R*)-**2a** = 46.92 min, > 99% *ee*.

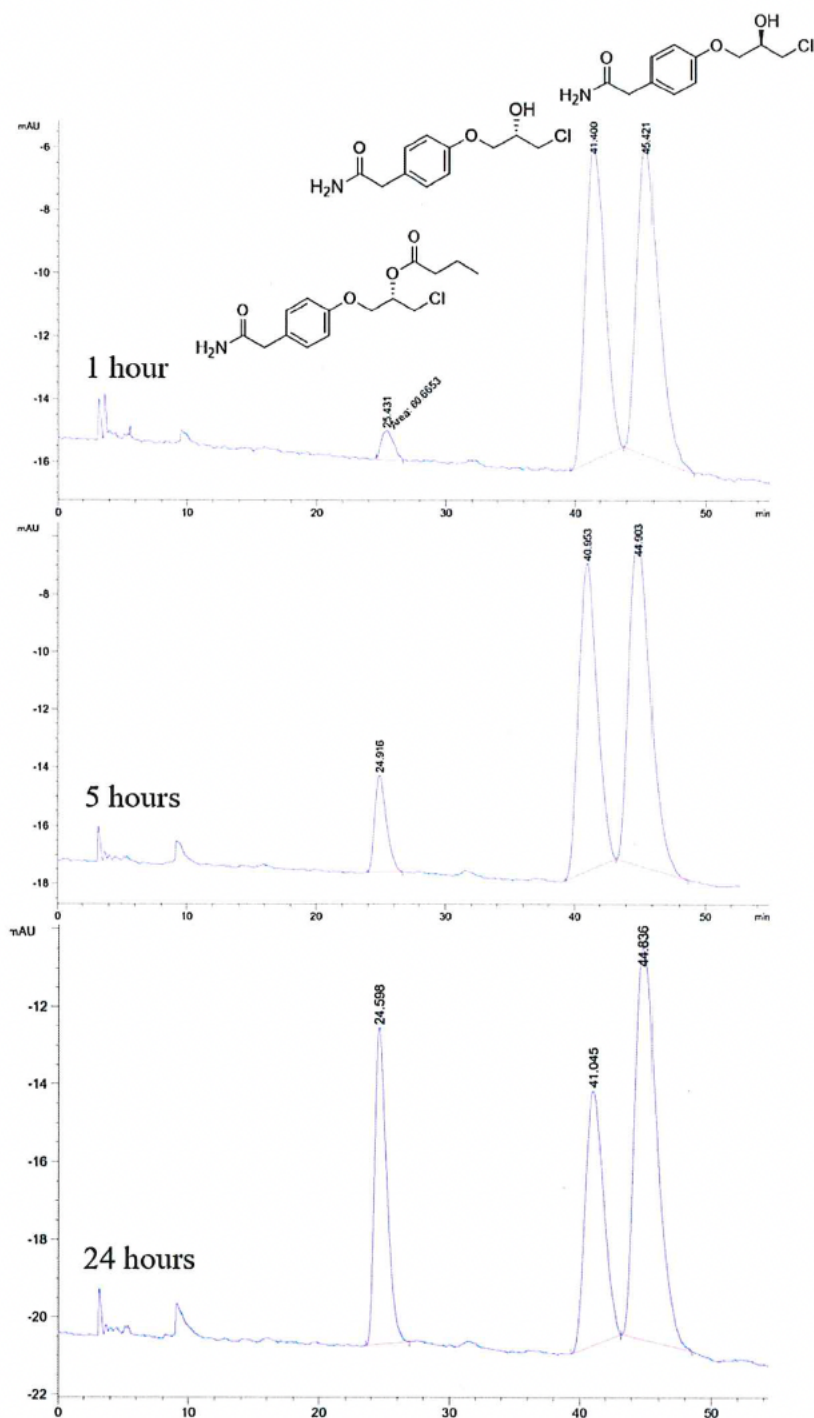

**Figure S3:** Kinetic resolution of **2a** catalyzed by CALB after 1, 5 and 24 hours of reaction. HPLC analyses performed on a Chiralcel OD-H column (250 mm L x 4.6 mm i.d, 5  $\mu$ m particle size) with isocratic eluent *i*-PrOH:*n*-hexane, 17:83, flow 1 mL/min. This gave unseparated ester enantiomers  $t_R$  (*R/S*)-**2b** = 25.37 min,  $t_R$  (*S*)-**2a** = 41.66 min and  $t_R$  (*R*)-**2a** = 45.22 min with  $R_s = 1.4$ .

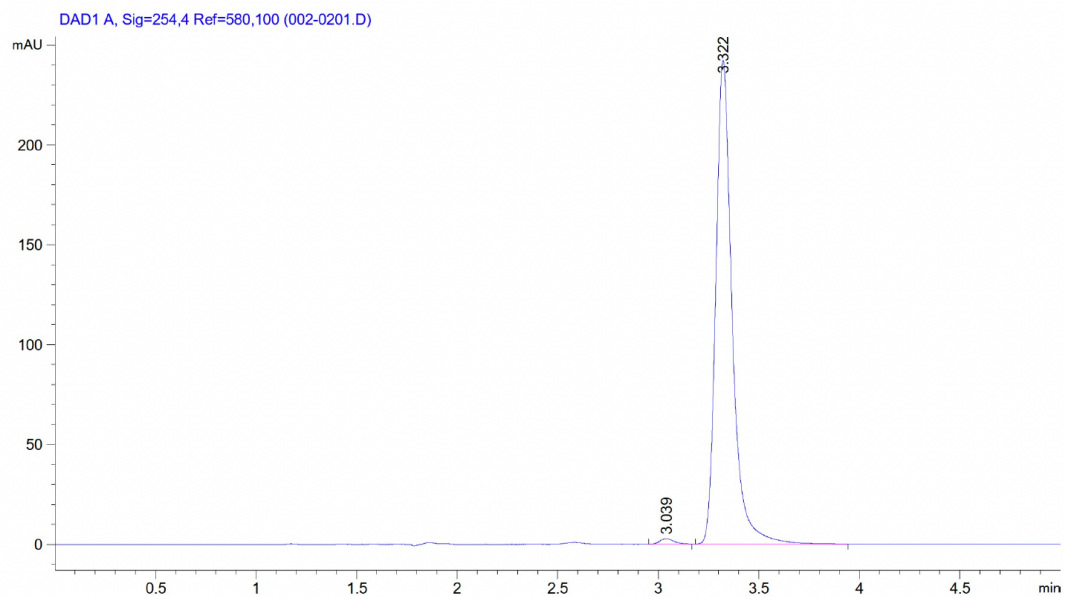

**Figure S4:** HPLC-chromatogram of chlorohydrin **2a** ( $t_R = 3.32$  min) analyzed on an (achiral) Agilent Zorbax Eclipse XBD-C18 column (150 mm L  $\times$  4.6 mm i.d., 5  $\mu$ m particle size) with an isocratic mobile phase H<sub>2</sub>O:MeCN,25:75 over 5 min, flow 1.0 mL/min.
